# Supplementary material
Source: Springer Nature journal article supplement (https://www.springermedizin.de/resource/supplementary/12936_2011_1991_MOESM4_ESM.pdf/9542114)

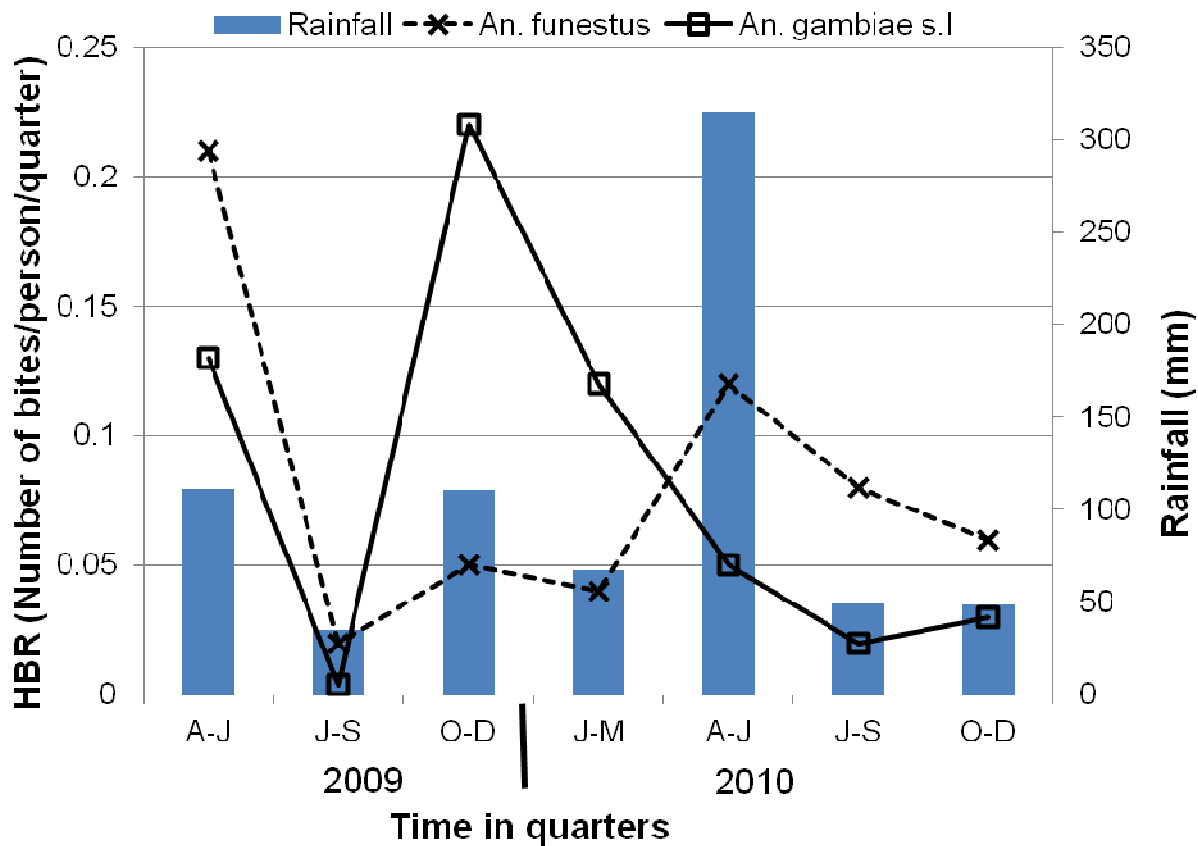

Supplement: MOESM4 [file 9542114]
